# Supplementary material for: Undiagnosed hypoglycaemia disorders in children detected when hypoglycaemia occurs in the setting of illness: a retrospective study
Source: HighWire-hosted journal article supplement (doi:10.1136/bmjpo-2022-001842), 2023-02-01
Supplement: bmjpo-2022-001842supp001_data_supplement.pdf [file bmjpo-2022-001842supp001_data_supplement.pdf]

**Supplemental Table 1. Details of genetic testing performed**

Of the genetic testing conducted, a commercial panel testing for glycogen storage diseases (sequencing of *AGL*, *G6PC*, *GAA*, *GBE1*, *GYS2*, *PFKM*, *PHKA1*, *PHKA2*, *PHKB*, *PHKG2*, *PYGL*, *PYGM*, *SLC2A2*, and *SLC37A4*) was obtained most frequently, in 14 patients. A ketotic hypoglycemia panel (sequencing and deletion/duplication analysis of *ACAT1*, *AGL*, *G6PC*, *GYS2*, *PHKA2*, *PHKB*, *PHKG2*, *PYGL*, *SLC16A1*, and *SLC37A4*) was obtained in 10 patients, hyperinsulinism panel (including sequencing of *ABCC8*, *KCNJ11*, *GCK*, *GLUD1* in all cases, with the addition of sequencing and deletion/duplication analysis of *ABCC8*, *KCNJ11*, *GLUD1*, *HADH*, *HNF1A*, *HNF4A*, *INSR*, *SLC16A1*, *UCP2* depending on the panel utilized) was obtained in six patients, fatty acid oxidation defect panel (sequencing and deletion/duplication analysis of *ACADVL*) was obtained in five patients, isolated *SLC16A1* mutation analysis was performed in three patients, and one patient had a commercial metabolic hypoglycemia panel (sequencing of *ACAT1*, *AGL*, *ALDOB*, *FBP1*, *G6PC*, *GALT*, *GYS2*, *HMGCL*, *MLYCD*, *OXCT1*, *PC*, *PCK1*, *PCK2*, *PGM1*, *PHKA2*, *PHKB*, *PHKG2*, *PYGL*, *SLC16A1*, *SLC2A2*, and *SLC37A4*) obtained. One child had targeted testing for Russel Silver syndrome based upon clinical examination findings. Chromosomal microarray was obtained in one patient and four patients had whole exome sequencing.
